# Supplementary material
Source: Springer Nature journal article supplement (https://www.springermedizin.de/resource/supplementary/12882_2014_759_MOESM1_ESM.pdf/9454650)

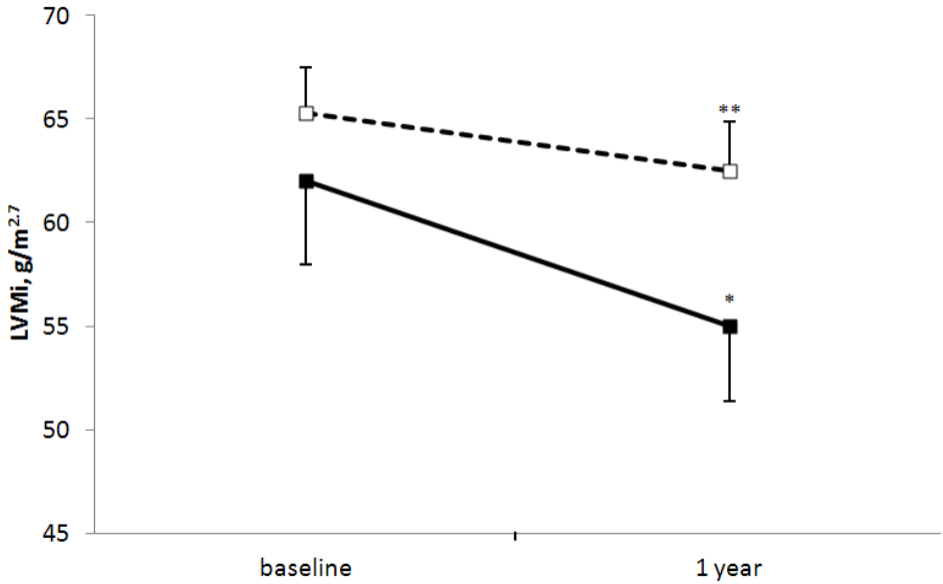

Supplement: MOESM1 [file 9454650]
